# Supplementary material
Source: publisher figshare collection journal article supplement (https://acs.figshare.com/ndownloader/files/4375012)
Supplement: Supplementary file 1 [file 4375012]

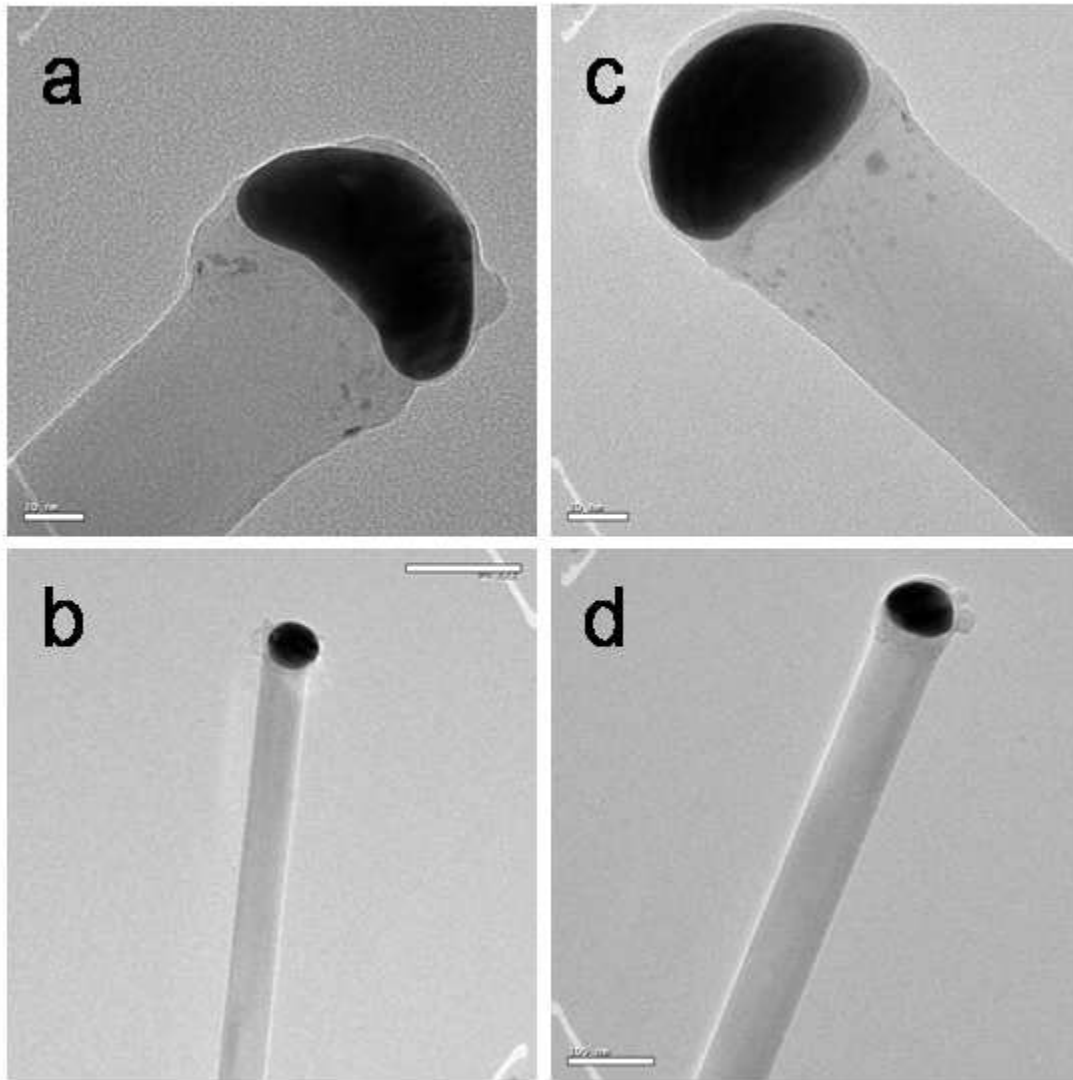

**Figure S1:** TEM images of the as-grown **(a, b)** and annealed **(c, d)** nanowires. Scale bars are: 20nm, 200nm, 20nm and 100nm for **(a)**, **(b)**, **(c)**, and **(d)**, respectively.
